# Supplementary material
Source: Springer Nature journal article supplement (https://www.springermedizin.de/resource/supplementary/12979_2013_177_MOESM2_ESM.pdf/9603166)

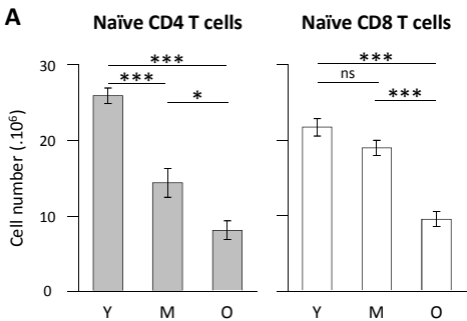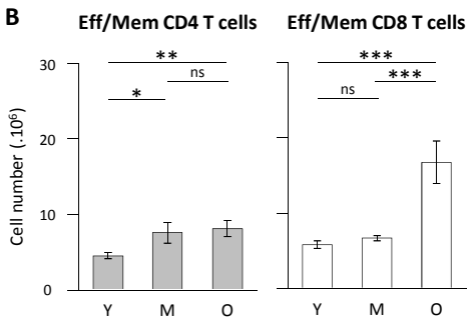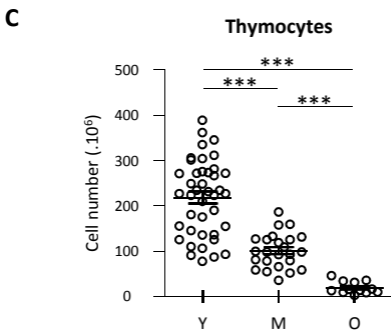

Supplement: MOESM2 [file 9603166]
